# Supplementary material
Source: PubMed Central journal article supplement (PMC6334640)
Supplement: NIHMS985913-supplement-Supp_figS.pdf [file NIHMS985913-supplement-Supp_figS.pdf]

Supplementary Analyses: Baseline and Follow-up Morphometric Networks

I. Adjacency Matrices

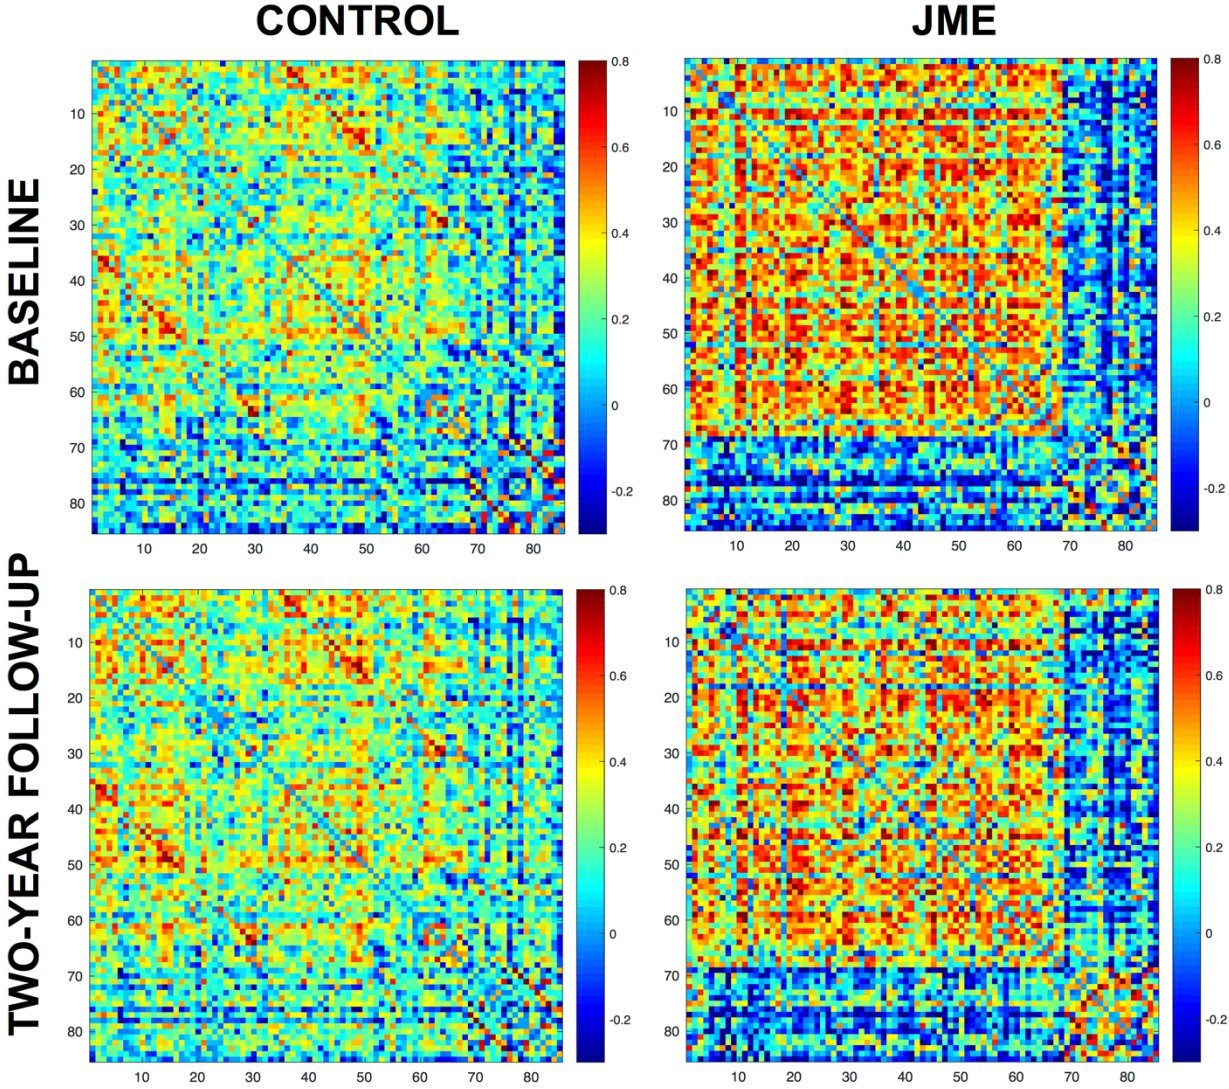

Figure 1S: Adjacency matrices of percentage change correlations in controls (left) and JME (right). The ordering of nodes is the same as in Table 1S.

## II. Community Structure

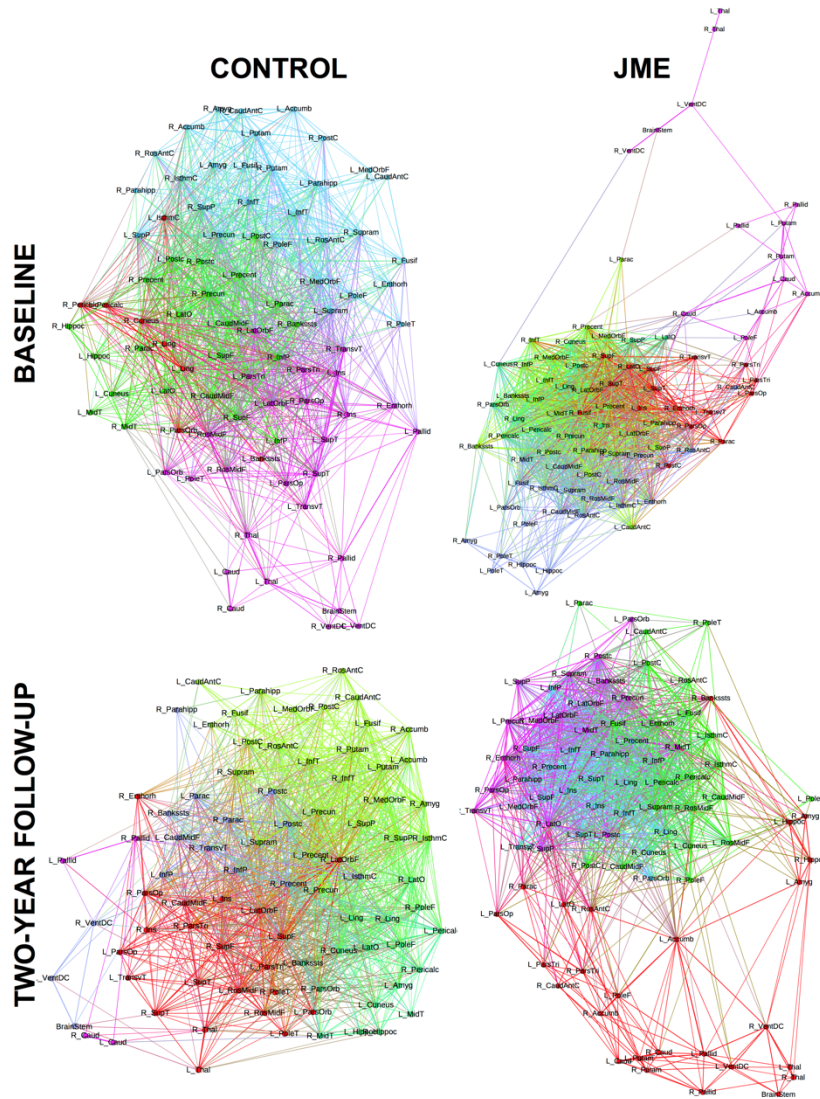

**Figure 2S:** Modularity in controls (left) and JME (right) at baseline (top) and follow-up (bottom).

Node abbreviations are the same as in Table 1S. Same color nodes belong to the same module. The spatial distribution of nodes was calculated using the force-atlas graph algorithm, where nodes that demonstrated stronger connections are located closer in space, while nodes with fewer connections tend to be farther in space. Calculated at a hybrid threshold of 35%.

### III. Global Measures

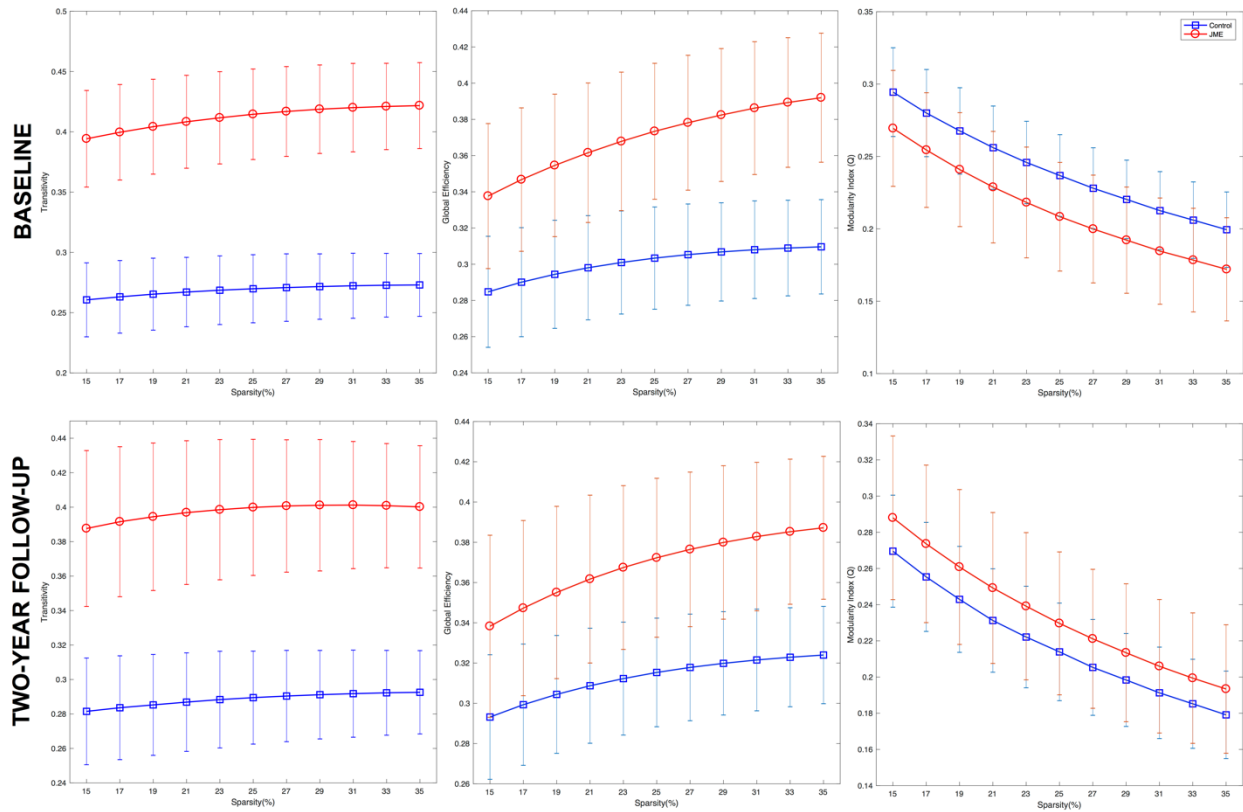

**Figure 3S:** Transitivity (left), global efficiency (middle), and modularity index (right) in controls (blue), and JME (red) at baseline (top) and follow-up (bottom). Error bars represent the standard deviation. Group differences were statistically significant at each sparsity level and for each test, and groups were also significantly different from zero; corrected for multiple comparisons (Bonferroni correction) at each time point.
